# Supplementary material for: Shifts in Forest Species Composition and Abundance under Climate Change Scenarios in Southern Carpathian Romanian Temperate Forests
Source: MDPI journal article supplement (doi:10.3390/f12111434), 2021-10-21
Supplement: s1 [file s1]

**Supplementary Table S1** Characteristics of the defined ecoregions within each forest type: main species composition, elevation range, soil attributes and main natural disturbances affecting the ecoregion. Disturbances: It: *I. typografus*; Id: *I. duplicatus*; Ha: *H. abietis*)

| Forest Type                  | Ecoregion        | Main Species                                                                          | Elevation (m) | Soil Type <sup>a</sup> | Soil Depth <sup>a</sup> | Soil Drainage <sup>a</sup> | Disturbances                    |
|------------------------------|------------------|---------------------------------------------------------------------------------------|---------------|------------------------|-------------------------|----------------------------|---------------------------------|
| <i>Picea</i>                 | Picea.1Ips       | <i>P. abies</i>                                                                       | > 1450        | Sandy-loam             | shallow                 | high                       | Windthrows;<br>Insects (It)     |
| <i>Picea</i>                 | Picea.1          | <i>P. abies</i>                                                                       | > 1450        | Sandy-loam             | intermediate            | high                       | Windthrows;<br>Insects (It)     |
| <i>Picea</i>                 | Picea.2          | <i>P. abies</i>                                                                       | 1200-1450     | Loam                   | intermediate            | high                       | Windthrows;<br>Insects (It)     |
| Mixed <i>Fagus</i> -conifers | Picea-Fagus      | <i>F. sylvatica</i> ,<br><i>P. abies</i>                                              | 1200-1450     | Sandy-loam             | intermediate            | low                        | Windthrows;<br>Insects (It, Id) |
| Mixed <i>Fagus</i> -conifers | Fagus-Picea      | <i>F. sylvatica</i> ,<br><i>P. abies</i>                                              | 900-1200      | Loam                   | intermediate            | low                        | Windthrows;<br>Insects (Id)     |
| Mixed <i>Fagus</i> -conifers | Fagus-Abies      | <i>A. alba</i> ,<br><i>F. sylvatica</i> ,<br><i>P. abies</i>                          | 900-1200      | Loam                   | deep                    | intermediate               | Windthrows;<br>Insects (It, Ha) |
| <i>Fagus</i>                 | Fagus.1          | <i>F. sylvatica</i>                                                                   | 1200-1450     | Loam                   | deep                    | intermediate               |                                 |
| <i>Fagus</i>                 | Fagus.2          | <i>F. sylvatica</i>                                                                   | 900-1200      | Loam                   | deep                    | low                        |                                 |
| <i>Fagus</i>                 | Fagus.3          | <i>F. sylvatica</i>                                                                   | 500 - 900     | Loam                   | deep                    | low                        |                                 |
| <i>Fagus</i>                 | Fagus.4          | <i>F. sylvatica</i>                                                                   | 500 - 900     | Clay-loam              | deep                    | low-intermediate           |                                 |
| Mixed broadleaves            | Fagus-Carpinus   | <i>C. betulus</i> ,<br><i>F. sylvatica</i>                                            | < 500         | Loam                   | deep                    | low                        |                                 |
| Mixed broadleaves            | Fagus-Quercus    | <i>F. sylvatica</i> ,<br><i>Q. petraea</i>                                            | < 500         | Clay-loam              | deep                    | low-intermediate           |                                 |
| Mixed broadleaves            | Quercus-Carpinus | <i>C. betulus</i> ,<br><i>Q. petraea</i>                                              | < 500         | Clay-loam              | deep                    | low                        |                                 |
| <i>Quercus</i>               | Quercus          | <i>Q. petraea</i> ,<br><i>Q. robur</i> ,<br><i>Q. frainetto</i> ,<br><i>Q. cerris</i> | < 500         | Clay-loam              | deep                    | low                        |                                 |

<sup>a</sup> Soil type based on USDA textural soil class. Soil type, depth and attributes derived from the "Harta Solurilor României la scara 1:200 000" [34] and, particularly, Soilgrids database (<https://www.isric.org/explore/soilgrids>) [35,111,112].
